# Supplementary material for: Synthesis, magnetism and spectral studies of six defective dicubane tetranuclear {M4O6} (M = NiII, CoII, ZnII) and three trinuclear CdII complexes with polydentate Schiff base ligands
Source: Royal Society of Chemistry journal article supplement (doi:10.1039/c6dt00380j), 2016-01-01
Supplement: c6dt00380j1.pdf [file c6dt00380j1.pdf]

**Synthesis, Magnetism and Spectrum Studies of Six Defective  
Dicubane  
Tetranuclear  $\{M_4O_6\}$  ( $M=Ni^{II}$ ,  $Co^{II}$ ,  $Zn^{II}$ ) and Three  
Trinuclear  $Cd^{II}$  Complexes with polydentate Schiff Base  
Ligands**

Lin Jiang, Dong-Yan Zhang, Jing-Jing Suo, Wen Gu, Jin-Lei Tian, Xin Liu, and Shi-Ping Yan

**Supplementary Information Contents:**

1. Scheme S1: Azide binding modes.
2. Fig. S2-S6: X-ray structures of complexes **3–6** and **9**.
3. Table S7-S9: Selected bond length (Å) and angle (°) for compounds **1–9**.
4. Fig. S10: UV–Vis reflectance spectra of **6–9** in  $BaSO_4$  after Kubelka–Munk transformation.
5. Fig. S11: PXRD patterns for complexes **1–9**.
6. Table S12: Geometry analysis for complexes.
7. Fig. S13: AC susceptibility signals for compound **1–3**.
8. Fig. S14: M versus H/T plot for complexes **1–3**.
9. Fig. S15 the best fitting of the Curie-Weiss law for **4** and **5**.
10. Fig. S16: AC susceptibility signals for compounds **4** and **5**.
11. Fig. S17: M versus H/T plot for complexes **4** and **5**.
12. Fig. S18 Excitation spectra of two ligands and complexes **6–9**.

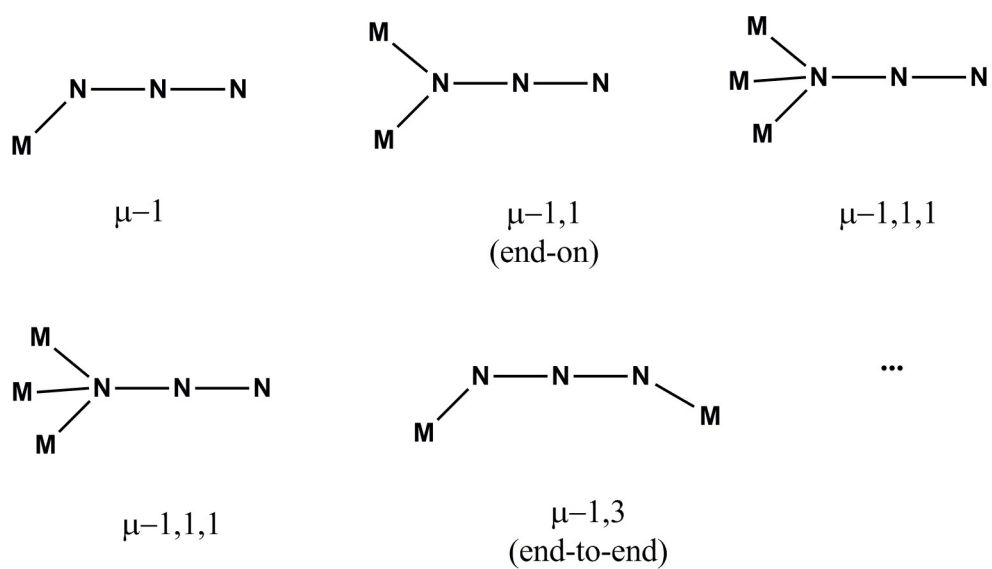

Scheme S1 Azide binding modes.

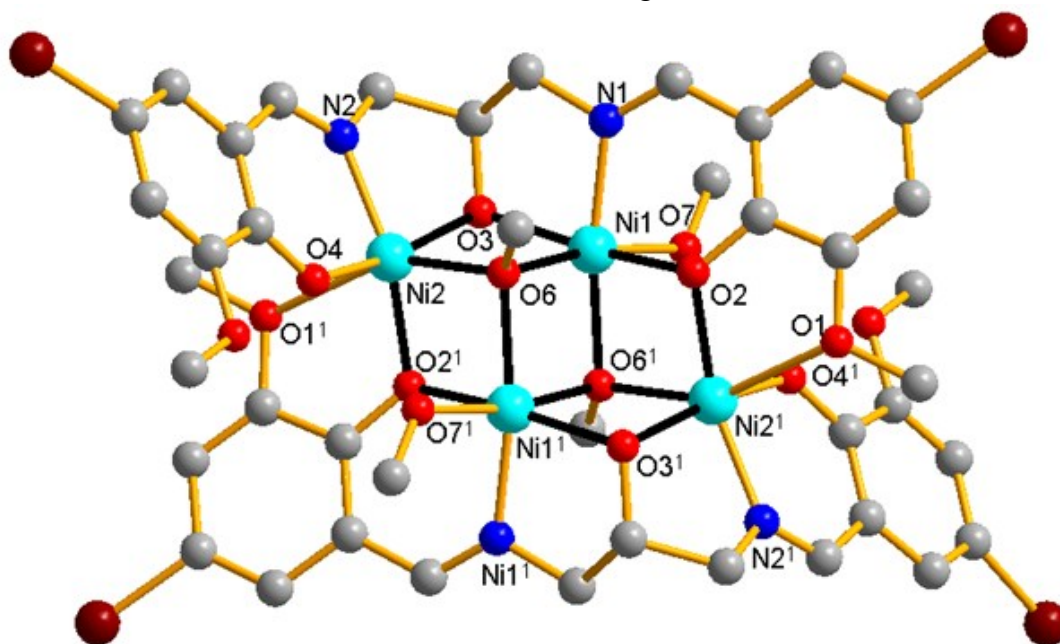

Fig. S2 Molecular structure of  $[\text{Ni}_4(\text{L}^2)_2(\mu_2 - \text{CH}_3\text{O})_2(\mu - \text{CH}_3\text{OH})_2](\text{CH}_3\text{OH})$  (**3**). The non-coordinated solvent molecules and H atoms are omitted for clarity.

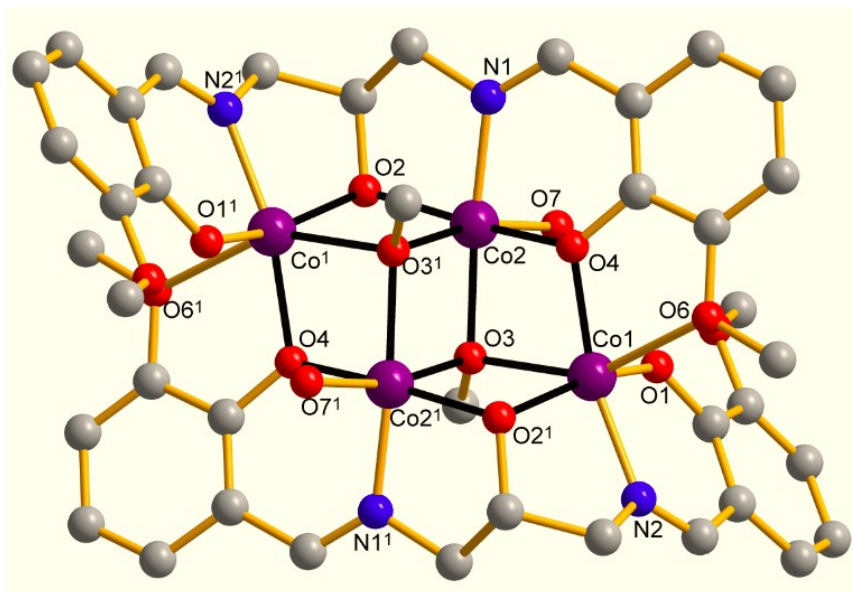

**Fig. S3** Molecular structure of  $[\text{Co}_4 \text{L}^2 (\mu_2 - \text{CH}_3\text{O})_2 (\mu - \text{H}_2\text{O})_2] (\text{CH}_3\text{OH})_2 \text{CHCl}_3$  (**4**). The non-coordinated solvent molecules and H atoms are omitted for clarity.

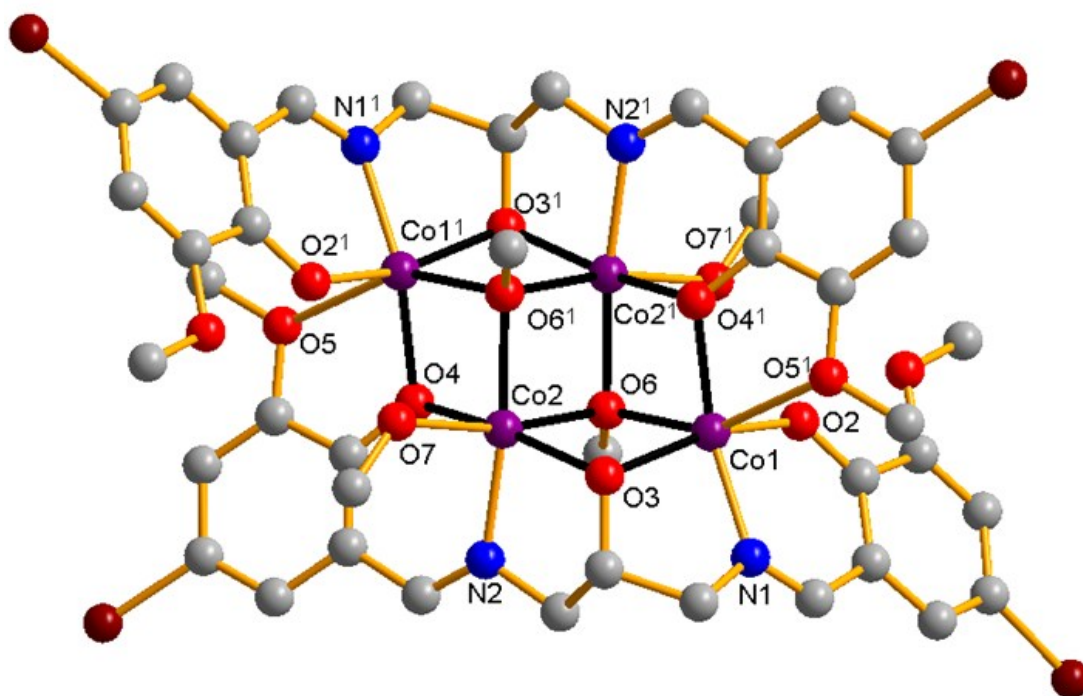

**Fig. S4** Molecular structure of  $[\text{Co}_4 (\text{L}^2)_2 (\mu_2 - \text{CH}_3\text{O})_2 (\mu - \text{CH}_3\text{OH})_2] (\text{CH}_3\text{OH}) (\text{H}_2\text{O})$  (**5**). The non-coordinated solvent molecules and H atoms are omitted for clarity

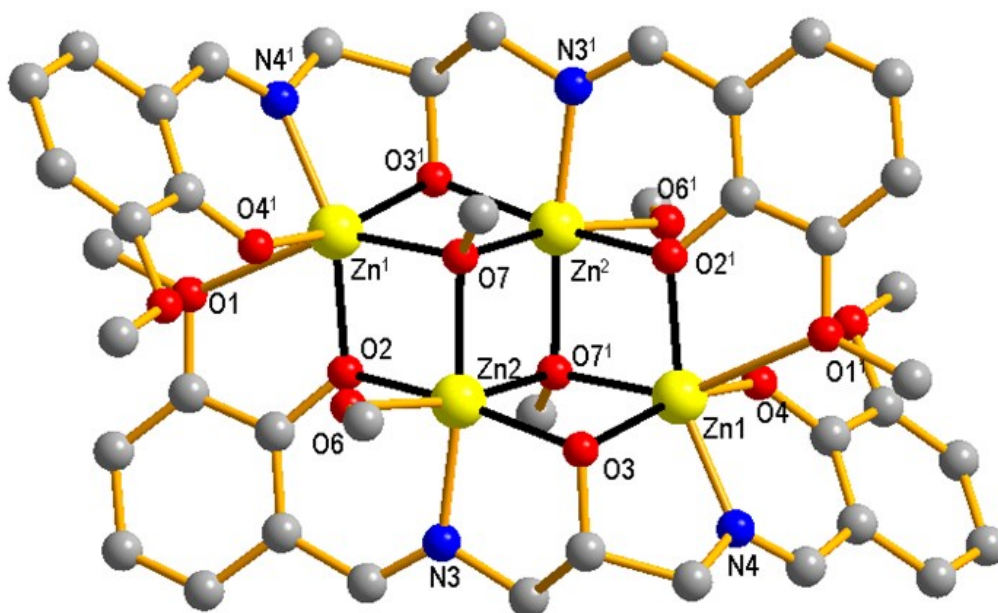

**Fig. S5** Molecular structure of  $[\text{Zn}_4\text{L}^2(\mu_2\text{-CH}_3\text{O})_2(\mu\text{-CH}_3\text{OH})_2](\text{CH}_3\text{OH})_2$  (**6**). The non-coordinated solvent molecules and H atoms are omitted for clarity.

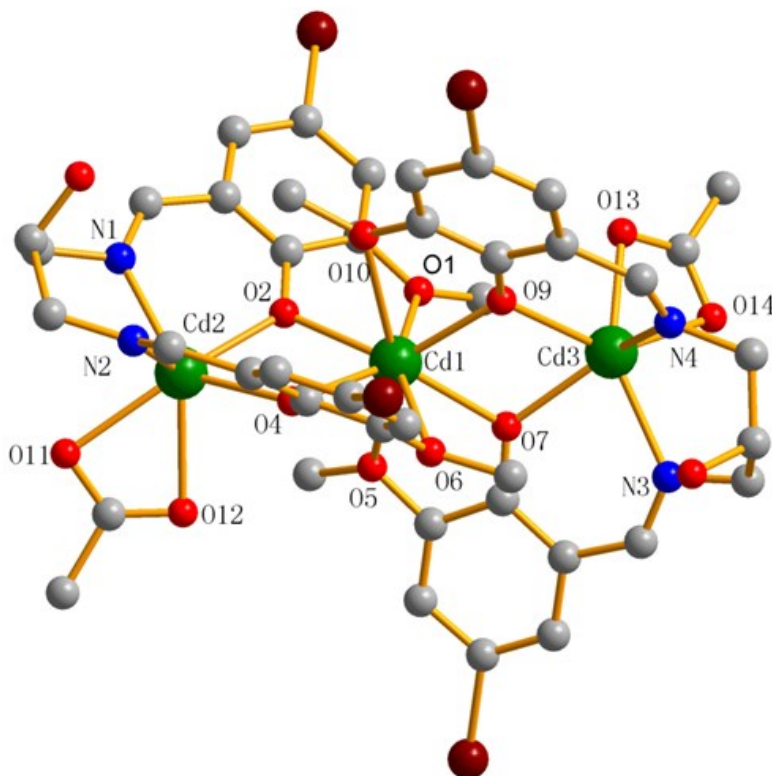

**Fig. S6** Molecular structure of  $[\text{Cd}_3(\text{HL}^2)_2(\text{OAc})_2](\text{CH}_3\text{OH})_2\text{CH}_2\text{Cl}_2$  (**9**). The non-coordinated solvent molecules and H atoms are omitted for clarity.

**Table S7** Selected bond length (Å) and angles(°) for compounds **1-4**.

| 1                                    |            | 2                       |            | 3                      |            | 4                       |            |
|--------------------------------------|------------|-------------------------|------------|------------------------|------------|-------------------------|------------|
| Ni2-O3 <sup>1</sup>                  | 2.026(3)   | Ni1-O1                  | 2.384(3)   | O2-Ni2 <sup>1</sup>    | 1.988(3)   | Co1-O3                  | 2.139(4)   |
| Ni2-O4                               | 2.006(3)   | Ni1-O2                  | 1.992(3)   | Ni1-O6 <sup>1</sup>    | 2.056(3)   | Co1-O4                  | 2.016(4)   |
| Ni2-N2                               | 1.996(3)   | Ni1-O3 <sup>1</sup>     | 2.110(3)   | Ni1-O6                 | 2.051(3)   | Co1-O1                  | 1.968(3)   |
| Ni2-N3 <sup>1</sup>                  | 2.107(3)   | Ni1-O4                  | 2.062(3)   | Ni1-N1                 | 1.991(4)   | Co1-O2 <sup>1</sup>     | 2.089(3)   |
| Ni2-N3                               | 2.095(3)   | Ni1-O6                  | 2.006(3)   | Ni1-O3                 | 2.049(4)   | Co1-O6                  | 2.400(4)   |
| Ni2-O6                               | 2.097(3)   | Ni1-N2                  | 1.988(3)   | Ni1-O2                 | 2.001(4)   | Co1-N2                  | 2.016(4)   |
| Ni1-O3                               | 2.067(3)   | Ni2-O2                  | 2.000(3)   | Ni1-O7                 | 2.107(4)   | Co2-O3                  | 2.040(4)   |
| Ni1-O4                               | 1.993(3)   | Ni2-O3                  | 2.075(3)   | Ni2-O6                 | 2.041(3)   | Co2-O3 <sup>1</sup>     | 2.017(4)   |
| Ni1-O5                               | 2.338(3)   | Ni2-O4 <sup>1</sup>     | 2.061(3)   | Ni2-O4                 | 2.002(3)   | Co2-O4                  | 1.942(4)   |
| Ni1-O2                               | 2.010(3)   | Ni2-O4                  | 2.080(3)   | Ni2-O1 <sup>1</sup>    | 2.410(3)   | Co2-O2                  | 1.974(4)   |
| Ni1-N1                               | 1.981(3)   | Ni2-O5                  | 2.135(3)   | Ni2-O3                 | 2.082(3)   | Co2-N1                  | 1.959(4)   |
| Ni1-N3                               | 2.118(3)   | Ni2-N1                  | 1.994(3)   | Ni2-O2 <sup>1</sup>    | 1.988(3)   | Co2-O7                  | 2.027(4)   |
| O3-Ni1 <sup>1</sup>                  | 2.026(3)   | O2-Ni1-O1               | 71.49(11)  | Ni2-N2                 | 1.982(4)   | O3-Co2 <sup>1</sup>     | 2.018(4)   |
| N3-Ni1 <sup>1</sup>                  | 2.107(3)   | O3 <sup>1</sup> -Ni1-O1 | 104.15(11) | O6-Ni1 <sup>1</sup>    | 2.056(3)   | O2-Co1 <sup>1</sup>     | 2.089(3)   |
| O3 <sup>1</sup> -Ni2-N3 <sup>1</sup> | 81.85(11)  | O3 <sup>1</sup> -Ni1-O2 | 97.62(11)  | O1-Ni2 <sup>1</sup>    | 2.410(3)   | O3-Co1-O6               | 149.26(14) |
| O3 <sup>1</sup> -Ni2-N3              | 106.42(11) | O4-Ni1-O1               | 151.85(10) | O6-Ni1-O61             | 84.77(13)  | O4-Co1-O3               | 78.38(14)  |
| O3 <sup>1</sup> -Ni2-O6              | 98.65(11)  | O4-Ni1-O2               | 80.47(10)  | O61-Ni1-O7             | 85.74(14)  | O4-Co1-O2 <sup>1</sup>  | 96.82(14)  |
| O4-Ni2-O3 <sup>1</sup>               | 168.46(10) | O4-Ni1-O3 <sup>1</sup>  | 81.69(10)  | O6-Ni1-O7              | 170.51(14) | O4-Co1-O6               | 70.96(14)  |
| O4-Ni2-N3 <sup>1</sup>               | 89.08(11)  | O6-Ni1-O1               | 85.87(12)  | N1-Ni1-O6              | 95.97(15)  | O1-Co1-O3               | 89.91(15)  |
| O4-Ni2-N3                            | 79.63(11)  | O6-Ni1-O2               | 91.70(11)  | N1-Ni1-O6 <sup>1</sup> | 169.09(16) | O1-Co1-O4               | 95.63(14)  |
| O4-Ni2-O6                            | 91.61(12)  | O6-Ni1-O3 <sup>1</sup>  | 168.05(11) | N1-Ni1-O3              | 84.38(16)  | O1-Co1-O2 <sup>1</sup>  | 160.34(16) |
| N2-Ni2-O3 <sup>1</sup>               | 85.47(12)  | O6-Ni1-O4               | 92.55(11)  | N1-Ni1-O2              | 88.52(16)  | O1-Co1-O6               | 95.14(15)  |
| N2-Ni2-O4                            | 88.21(12)  | N2-Ni1-O1               | 91.86(13)  | N1-Ni1-O7              | 93.39(16)  | O1-Co1-N2               | 91.43(16)  |
| N2-Ni2-N3                            | 167.83(12) | N2-Ni1-O2               | 162.84(13) | O3-Ni1-O6 <sup>1</sup> | 106.48(13) | O2 <sup>1</sup> -Co1-O3 | 77.81(14)  |
| N2-Ni2-N31                           | 94.75(12)  | N2-Ni1-O3 <sup>1</sup>  | 82.09(12)  | O3-Ni1-O6              | 82.14(14)  | O2 <sup>1</sup> -Co1-O6 | 103.27(14) |
| N2-Ni2-O6                            | 96.09(12)  | N2-Ni1-O4               | 116.28(12) | O3-Ni1-O7              | 100.38(15) | N2-Co1-O3               | 120.31(17) |
| N3-Ni2-N3 <sup>1</sup>               | 84.64(12)  | N2-Ni1-O6               | 91.21(13)  | O2-Ni1-O6              | 90.26(14)  | N2-Co1-O4               | 160.10(17) |
| N3-Ni2-O6                            | 84.84(11)  | O3-Ni2-O2               | 170.06(11) | O2-Ni1-O61             | 80.58(13)  | N2-Co1-O2 <sup>1</sup>  | 81.88(16)  |
| O6-Ni2-N3 <sup>1</sup>               | 169.15(11) | O4 <sup>1</sup> -Ni2-O2 | 90.71(11)  | O2-Ni1-O3              | 168.99(14) | N2-Co1-O6               | 89.92(16)  |
| O3-Ni1-O5                            | 103.14(10) | O4-Ni2-O2               | 79.85(10)  | O2-Ni1-O7              | 88.42(15)  | O3 <sup>1</sup> -Co2-O3 | 79.06(16)  |
| O3-Ni1-N3                            | 80.63(11)  | O4 <sup>1</sup> -Ni2-O3 | 82.58(10)  | O6-Ni2-O11             | 152.01(12) | O3 <sup>1</sup> -Co2-O7 | 167.5(2)   |
| O4-Ni1-O3                            | 97.77(10)  | O4-Ni2-O3               | 106.64(10) | O6-Ni2-O3              | 81.59(13)  | O4-Co2-O3 <sup>1</sup>  | 87.82(15)  |
| O4-Ni1-O5                            | 72.47(10)  | O5-Ni2-O2               | 85.98(11)  | O4-Ni2-O6              | 92.45(14)  | O4-Co2-O3               | 82.56(16)  |
| O4-Ni1-O2                            | 90.78(11)  | O5-Ni2-O3               | 101.53(11) | O4-Ni2-O1 <sup>1</sup> | 83.80(14)  | O4-Co2-O2               | 168.86(15) |
| O4-Ni1-N3                            | 79.35(11)  | O5-Ni2-O4 <sup>1</sup>  | 172.42(10) | O4-Ni2-O3              | 167.90(13) | O4-Co2-N1               | 89.84(17)  |
| O2-Ni1-O3                            | 168.41(10) | O5-Ni2-O4               | 88.26(10)  | O3-Ni2-O11             | 106.38(13) | O4-Co2-O7               | 90.46(18)  |
| O2-Ni1-O5                            | 86.85(11)  | N1-Ni2-O2               | 89.26(12)  | O21-Ni2-O6             | 81.27(13)  | O2-Co2-O3               | 102.41(16) |
| O2-Ni1-N3                            | 93.36(11)  | N1-Ni2-O3               | 84.28(12)  | O21-Ni2-O4             | 92.50(14)  | O2-Co2-O3 <sup>1</sup>  | 83.42(15)  |
| N1-Ni1-O3                            | 82.62(12)  | N1-Ni2-O4 <sup>1</sup>  | 96.69(12)  | O21-Ni2-O11            | 71.24(13)  | O2-Co2-O7               | 99.57(17)  |
| N1-Ni1-O4                            | 165.19(12) | N1-Ni2-O4               | 169.07(12) | O21-Ni2-O3             | 96.96(14)  | N1-Co2-O3               | 172.02(17) |
| N1-Ni1-O5                            | 92.97(11)  | N1-Ni2-O5               | 90.09(12)  | N2-Ni2-O6              | 118.06(15) | N1-Co2-O31              | 98.30(16)  |

|                          |            |                          |            |                          |            |                          |            |
|--------------------------|------------|--------------------------|------------|--------------------------|------------|--------------------------|------------|
| N1-Ni1-O2                | 91.12(13)  | Ni2-O2-Ni1               | 101.88(11) | N2-Ni2-O4                | 91.30(16)  | N1-Co2-O2                | 84.65(17)  |
| N1-Ni1-N3                | 115.19(12) | Ni2-O3-Ni1 <sup>1</sup>  | 96.08(11)  | N2-Ni2-O11               | 89.81(14)  | N1-Co2-O7                | 94.1(2)    |
| N3-Ni1-O5                | 151.82(10) | Ni2-O4-Ni1               | 96.89(10)  | N2-Ni2-O3                | 82.36(15)  | O7-Co2-O3                | 88.4(2)    |
| Ni21-O3-Ni1              | 99.91(11)  | Ni2 <sup>1</sup> -O4-Ni1 | 98.03(11)  | N2-Ni2-O2 <sup>1</sup>   | 160.12(16) | Co2 <sup>1</sup> -O3-Co1 | 97.39(15)  |
| Ni1-O4-Ni2               | 103.70(12) |                          |            | Ni1-O6-Ni1 <sup>1</sup>  | 95.23(13)  | Co2-O3-Co1               | 95.10(17)  |
| Ni2-N3-Ni2 <sup>1</sup>  | 95.36(12)  |                          |            | Ni2-O6-Ni1 <sup>1</sup>  | 97.94(14)  | Co2 <sup>1</sup> -O3-Co2 | 100.94(16) |
| Ni2 <sup>1</sup> -N3-Ni1 | 95.72(11)  |                          |            | Ni2-O6-Ni1 <sup>1</sup>  | 96.77(13)  | Co2-O4-Co1               | 102.36(16) |
| Ni2-N3-Ni1               | 96.57(12)  |                          |            | Ni1-O3-Ni2               | 96.69(14)  | Co2-O2-Co1 <sup>1</sup>  | 100.45(14) |
|                          |            |                          |            | Ni21-O2-Ni1              | 100.36(14) |                          |            |
| <sup>1</sup> -X,-Y,-Z    |            | <sup>1</sup> -X,-Y,-1-Z  |            | <sup>1</sup> 1-X,1-Y,1-Z |            | <sup>1</sup> 1-X,1-Y,1-Z |            |

**Table S8** Selected bond length (Å) and angles(°) for compounds **5-7**

| 5                       |            | 6                       |            | 7                   |            |
|-------------------------|------------|-------------------------|------------|---------------------|------------|
| Co2-O4                  | 2.046(2)   | Zn1-O3                  | 2.0544(16) | Cd2-Cl1             | 2.4581(10) |
| Co2-O3                  | 2.052(2)   | Zn1-O2                  | 2.0794(16) | Cd2-O4              | 2.249(2)   |
| Co2-O6                  | 2.112(2)   | Zn1-O6                  | 2.2020(17) | Cd2-O2              | 2.251(3)   |
| Co2-O6 <sup>1</sup>     | 2.066(2)   | Zn1-O7 <sup>1</sup>     | 2.1636(16) | Cd2-N1              | 2.256(3)   |
| Co2-O7                  | 2.148(3)   | Zn1-O7                  | 2.0225(15) | Cd2-N2              | 2.272(3)   |
| Co2-N2                  | 2.040(3)   | Zn1-N3                  | 2.0451(19) | Cd1-O1              | 2.599(2)   |
| Co1-O4 <sup>1</sup>     | 2.027(2)   | Zn2-O3                  | 2.1654(16) | Cd1-O1 <sup>1</sup> | 2.599(2)   |
| Co1-O3                  | 2.112(2)   | Zn2-O2 <sup>1</sup>     | 2.0013(16) | Cd1-O5 <sup>1</sup> | 2.508(2)   |
| Co1-O6                  | 2.098(2)   | Zn2-O4                  | 2.0122(17) | Cd1-O5              | 2.508(2)   |
| Co1-O2                  | 2.009(2)   | Zn2-O7 <sup>1</sup>     | 2.0650(16) | Cd1-O4              | 2.284(2)   |
| Co1-N1                  | 2.029(3)   | Zn2-N4                  | 2.0202(19) | Cd1-O4 <sup>1</sup> | 2.284(2)   |
| O3-Co2-O4               | 165.65(9)  | O2-Zn1-O3               | 166.44(6)  | Cd1-O2 <sup>1</sup> | 2.310(2)   |
| O6-Co2-O4               | 88.59(9)   | O6-Zn1-O3               | 103.99(6)  | Cd1-O2              | 2.310(2)   |
| O6 <sup>1</sup> -Co2-O4 | 81.89(9)   | O6-Zn1-O2               | 86.16(6)   | O4-Cd2-Cl1          | 123.56(6)  |
| O6 <sup>1</sup> -Co2-O3 | 107.48(9)  | O7-Zn1-O3               | 106.49(6)  | O4-Cd2-O2           | 74.65(8)   |
| O6-Co2-O3               | 81.78(9)   | O7 <sup>1</sup> -Zn1-O3 | 83.63(6)   | O4-Cd2-N1           | 132.35(9)  |
| O7-Co2-O4               | 89.14(10)  | O7-Zn1-O2               | 82.21(6)   | O4-Cd2-N2           | 82.16(10)  |
| O7-Co2-O3               | 102.25(10) | O7 <sup>1</sup> -Zn1-O2 | 87.42(6)   | O2-Cd2-Cl1          | 117.05(7)  |
| O7-Co2-O6               | 169.14(9)  | O7-Zn1-O6               | 89.56(6)   | O2-Cd2-N1           | 84.63(10)  |
| O7-Co2-O6 <sup>1</sup>  | 85.20(9)   | O7 <sup>1</sup> -Zn1-O6 | 170.02(6)  | O2-Cd2-N2           | 140.29(10) |
| N2-Co2-O4               | 87.30(10)  | N3-Zn1-O3               | 83.39(7)   | N1-Cd2-Cl1          | 104.09(8)  |

|                                |            |                                       |           |                                      |            |
|--------------------------------|------------|---------------------------------------|-----------|--------------------------------------|------------|
| N2-Co2-O3                      | 83.06(10)  | N3-Zn1-O2                             | 87.05(7)  | N1-Cd2-N2                            | 87.91(12)  |
| N2-Co2-O6                      | 95.43(10)  | N3-Zn1-O6                             | 93.66(7)  | N2-Cd2-Cl1                           | 102.60(9)  |
| N2-Co2-O6 <sup>1</sup>         | 169.18(11) | N3-Zn1-O7                             | 168.55(7) | O1 <sup>1</sup> -Cd1-O1              | 92.98(11)  |
| N2-Co2-O7                      | 95.08(11)  | N3-Zn1-O7 <sup>1</sup>                | 93.63(7)  | O5 <sup>1</sup> -Cd1-O1              | 95.72(8)   |
| O3-Co1-O4 <sup>1</sup>         | 98.34(9)   | O2 <sup>1</sup> -Zn2-O3               | 99.03(6)  | O5-Cd1-O1 <sup>1</sup>               | 95.72(8)   |
| O6-Co1-O4 <sup>1</sup>         | 81.55(9)   | O4-Zn2-O3                             | 163.70(6) | O5-Cd1-O1                            | 158.04(8)  |
| O6-Co1-O3                      | 80.71(9)   | O4-Zn2-O2 <sup>1</sup>                | 95.47(7)  | O5 <sup>1</sup> -Cd1-O1 <sup>1</sup> | 158.04(8)  |
| O2-Co1-O4 <sup>1</sup>         | 95.71(10)  | O7 <sup>1</sup> -Zn2-O3               | 83.33(6)  | O5-Cd1-O5 <sup>1</sup>               | 83.52(11)  |
| O2-Co1-O3                      | 162.59(9)  | O7 <sup>1</sup> -Zn2-O21              | 83.08(6)  | O4-Cd1-O1                            | 136.18(8)  |
| O2-Co1-O6                      | 91.28(9)   | O7 <sup>1</sup> -Zn2-O4               | 91.10(6)  | O4-Cd1-O11                           | 78.18(8)   |
| N1-Co1-O4 <sup>1</sup>         | 158.78(11) | N4-Zn2-O3                             | 80.32(7)  | O4 <sup>1</sup> -Cd1-O1 <sup>1</sup> | 136.18(8)  |
| N1-Co1-O3                      | 80.34(10)  | N4-Zn2-O21                            | 152.57(7) | O4 <sup>1</sup> -Cd1-O1              | 78.18(8)   |
| N1-Co1-O6                      | 118.76(10) | N4-Zn2-O4                             | 90.21(7)  | O4-Cd1-O5 <sup>1</sup>               | 81.60(8)   |
| N1-Co1-O2                      | 90.21(11)  | N4-Zn2-O7 <sup>1</sup>                | 123.70(7) | O4-Cd1-O5                            | 65.56(8)   |
| Co1 <sup>1</sup> -O4-Co2       | 99.14(10)  | Zn2-O3-Zn1                            | 95.79(6)  | O4 <sup>1</sup> -Cd1-O5 <sup>1</sup> | 65.56(8)   |
| C18-O4-Co2                     | 124.9(2)   | Zn2 <sup>1</sup> -O2-Zn1              | 96.86(6)  | O4 <sup>1</sup> -Cd1-O5              | 81.60(8)   |
| C18-O4-Co1 <sup>1</sup>        | 122.7(2)   | Zn2 <sup>1</sup> -O7-Zn1              | 96.66(6)  | O4-Cd1-O4 <sup>1</sup>               | 135.92(11) |
| Co1-O3-Co2                     | 98.31(10)  | Zn2 <sup>1</sup> -O7-Zn1 <sup>1</sup> | 95.53(6)  | O4 <sup>1</sup> -Cd1-O2              | 131.15(9)  |
| C10-O3-Co2                     | 111.85(19) |                                       |           | O4-Cd1-O2 <sup>1</sup>               | 131.15(9)  |
| C10-O3-Co1                     | 110.78(19) |                                       |           | O4 <sup>1</sup> -Cd1-O2 <sup>1</sup> | 72.85(8)   |
| Co1-O6-Co2 <sup>1</sup>        | 96.22(9)   |                                       |           | O4-Cd1-O2                            | 72.85(8)   |
| Co1-O6-Co2                     | 96.87(9)   |                                       |           | O2 <sup>1</sup> -Cd1-O1              | 77.42(8)   |
|                                |            |                                       |           | O2-Cd1-O1 <sup>1</sup>               | 77.42(8)   |
|                                |            |                                       |           | O2-Cd1-O1                            | 63.34(8)   |
|                                |            |                                       |           | O2 <sup>1</sup> -Cd1-O1 <sup>1</sup> | 63.34(8)   |
|                                |            |                                       |           | O2-Cd1-O5                            | 138.35(8)  |
|                                |            |                                       |           | O2 <sup>1</sup> -Cd1-O5              | 88.56(8)   |
|                                |            |                                       |           | O2-Cd1-O5 <sup>1</sup>               | 88.56(8)   |
|                                |            |                                       |           | O2 <sup>1</sup> -Cd1-O5 <sup>1</sup> | 138.35(8)  |
|                                |            |                                       |           | O2 <sup>1</sup> -Cd1-O2              | 122.11(12) |
| <sup>1</sup> 1/2-X,3/2-Y,1/2-Z |            | <sup>1</sup> 2-X,1-Y,1-Z              |           | 1-X,+Y,1/2-Z                         |            |

**Table S9** Selected bond length (Å) and angles(°) for compounds **8-9**.

| 8         |           |             |            | 9          |           |             |            |
|-----------|-----------|-------------|------------|------------|-----------|-------------|------------|
| Cd1-O2    | 2.274(2)  | N1-Cd2-N2   | 89.59(12)  | Cd1-O10    | 2.623(3)  | O4-Cd2-O2   | 84.38(13)  |
| Cd1-O4    | 2.267(2)  | N1-Cd2-O11  | 89.83(12)  | Cd1-O2     | 2.259(3)  | O4-Cd2-O12  | 126.93(14) |
| Cd1-O1    | 2.624(2)  | O9-Cd3-O7   | 73.97(9)   | Cd1-O4     | 2.277(3)  | O4-Cd2-O11  | 81.71(12)  |
| Cd1-O9    | 2.273(2)  | O9-Cd3-N3   | 82.86(11)  | Cd1-O6     | 2.549(3)  | O4-Cd2-N2   | 135.24(12) |
| Cd1-O6    | 2.533(2)  | O9-Cd3-O13  | 127.12(10) | Cd1-O7     | 2.260(3)  | O4-Cd2-N1   | 107.10(16) |
| Cd1-O5    | 2.571(2)  | O9-Cd3-N4   | 139.63(11) | Cd1-O5     | 2.610(3)  | O4-Cd2-C39  | 27.16(17)  |
| Cd1-O7    | 2.263(2)  | O9-Cd3-O14  | 87.28(10)  | Cd1-O9     | 2.263(3)  | O12-Cd2-C39 | 55.51(15)  |
| Cd2-O2    | 2.264(2)  | O9-Cd3-C41  | 108.24(11) | Cd1-O1     | 2.532(3)  | O11-Cd2-O12 | 28.46(19)  |
| Cd2-O4    | 2.241(2)  | O7-Cd3-N3   | 125.13(10) | Cd2-O2     | 2.277(3)  | O11-Cd2-C39 | 115.56(14) |
| Cd2-O12   | 2.279(3)  | O7-Cd3-O13  | 145.41(10) | Cd2-O4     | 2.256(3)  | N2-Cd2-O12  | 86.07(18)  |
| Cd2-N2    | 2.281(3)  | O7-Cd3-O14  | 107.19(10) | Cd2-O12    | 2.389(4)  | N2-Cd2-O11  | 86.06(13)  |
| Cd2-O11   | 2.549(3)  | O7-Cd3-C41  | 129.16(11) | Cd2-O11    | 2.369(5)  | N2-Cd2-N1   | 103.7(2)   |
| Cd2-N1    | 2.245(3)  | N3-Cd3-O13  | 87.44(11)  | Cd2-N2     | 2.289(4)  | N2-Cd2-C39  | 138.87(14) |
| Cd3-O9    | 2.229(2)  | N4-Cd3-C41  | 120.80(12) | Cd2-N1     | 2.292(4)  | N1-Cd2-O12  | 94.67(15)  |
| Cd3-O7    | 2.288(2)  | O14-Cd3-O13 | 105.09(12) | Cd2-C39    | 2.712(6)  | N1-Cd2-O11  | 117.63(17) |
| Cd3-N3    | 2.293(3)  |             |            | Cd3-O7     | 2.249(3)  | N1-Cd2-C39  | 73.12(11)  |
| Cd3-O13   | 2.433(3)  |             |            | Cd3-O9     | 2.269(3)  | O7-Cd3-O9   | 118.33(15) |
| Cd3-N4    | 2.270(3)  |             |            | Cd3-O14    | 2.417(4)  | O7-Cd3-O14  | 113.47(14) |
| Cd3-O14   | 2.346(3)  |             |            | Cd3-O13    | 2.295(4)  | O7-Cd3-O13  | 80.54(12)  |
| O2-Cd1-O1 | 63.28(8)  |             |            | Cd3-N3     | 2.295(4)  | O7-Cd3-N3   | 120.24(14) |
| O2-Cd1-O6 | 93.23(9)  |             |            | Cd3-N4     | 2.240(4)  | O7-Cd3-C41  | 140.62(13) |
| O2-Cd1-O5 | 136.52(8) |             |            | O2-Cd1-O10 | 76.99(10) | O9-Cd3-O14  | 86.94(14)  |



|            |            |            |            |             |            |
|------------|------------|------------|------------|-------------|------------|
| O4-Cd1-O2  | 72.98(8)   | O2-Cd1-O4  | 74.10(10)  | O9-Cd3-O13  | 130.91(13) |
|            |            |            |            | )           |            |
| O4-Cd1-O1  | 135.77(8)  | O2-Cd1-O6  | 79.55(10)  | O9-Cd3-N3   | 113.60(16) |
|            |            |            |            | )           |            |
| O4-Cd1-O9  | 131.07(9)  | O2-Cd1-O7  | 135.78(11) | O9-Cd3-C41  | 27.06(16)  |
|            |            |            | )          |             |            |
| O4-Cd1-O6  | 82.24(8)   | O2-Cd1-O5  | 137.24(10) | O14-Cd3-C41 | 53.69(15)  |
|            |            |            | )          |             |            |
| O4-Cd1-O5  | 64.39(8)   | O2-Cd1-O9  | 131.29(11) | O13-Cd3-O14 | 26.67(15)  |
|            |            |            | )          |             |            |
| O9-Cd1-O2  | 116.12(9)  | O2-Cd1-O1  | 65.27(10)  | O13-Cd3-C41 | 88.36(15)  |
|            |            |            |            |             |            |
| O9-Cd1-O1  | 77.45(8)   | O4-Cd1-O10 | 75.93(10)  | N3-Cd3-O14  | 142.00(15) |
|            |            |            |            | )           |            |
| O9-Cd1-O6  | 139.51(8)  | O4-Cd1-O6  | 95.77(11)  | N3-Cd3-O13  | 115.42(17) |
|            |            |            |            | )           |            |
| O9-Cd1-O5  | 98.64(8)   | O4-Cd1-O5  | 63.22(10)  | N3-Cd3-C41  | 135.95(15) |
|            |            |            |            | )           |            |
| O6-Cd1-O1  | 93.55(8)   | O4-Cd1-O1  | 139.23(10) | N4-Cd3-O7   | 83.31(14)  |
|            |            |            | )          |             |            |
| O6-Cd1-O5  | 73.56(9)   | O6-Cd1-O10 | 156.45(9)  | N4-Cd3-O9   | 103.61(18) |
|            |            |            |            | )           |            |
| O5-Cd1-O1  | 155.48(8)  | O6-Cd1-O5  | 101.43(10) | N4-Cd3-O14  | 101.52(17) |
|            |            |            | )          |             | )          |
| O7-Cd1-O2  | 134.71(9)  | O7-Cd1-O10 | 136.34(10) | N4-Cd3-O13  | 88.18(15)  |
|            |            |            | )          |             |            |
| O7-Cd1-O4  | 136.29(9)  | O7-Cd1-O4  | 132.33(11) | N4-Cd3-N3   | 103.11(17) |
|            |            |            | )          |             | )          |
| O7-Cd1-O1  | 77.77(8)   | O7-Cd1-O6  | 64.95(10)  |             |            |
| O7-Cd1-O9  | 73.64(9)   | O7-Cd1-O5  | 77.84(10)  |             |            |
| O7-Cd1-O6  | 65.87(8)   | O7-Cd1-O9  | 73.02(11)  |             |            |
| O7-Cd1-O5  | 77.92(8)   | O7-Cd1-O1  | 79.82(10)  |             |            |
| O2-Cd2-O12 | 89.78(10)  | O5-Cd1-O10 | 94.45(10)  |             |            |
|            |            |            |            |             |            |
| O2-Cd2-N2  | 134.32(10) | O9-Cd1-O10 | 63.47(10)  |             |            |
|            | )          |            |            |             |            |
| O2-Cd2-O11 | 139.39(10) | O9-Cd1-O4  | 118.69(11) |             |            |
|            | )          |            | )          |             |            |
| O4-Cd2-O2  | 73.66(8)   | O9-Cd1-O6  | 137.33(11) |             |            |
|            |            |            | )          |             |            |
| O4-Cd2-O12 | 112.20(10) | O9-Cd1-O5  | 75.82(10)  |             |            |
|            | )          |            |            |             |            |
| O4-Cd2-N2  | 81.53(10)  | O9-Cd1-O1  | 91.81(11)  |             |            |

|             |            |            |            |
|-------------|------------|------------|------------|
| O4-Cd2-O11  | 131.64(11) | O1-Cd1-O10 | 97.43(10)  |
| O4-Cd2-N1   | 136.03(11) | O1-Cd1-O6  | 74.28(11)  |
| O12-Cd2-N2  | 135.49(11) | O1-Cd1-O5  | 156.81(10) |
| O12-Cd2-O11 | 53.38(10)  | O2-Cd2-O12 | 108.40(13) |
| N2-Cd2-O11  | 85.23(10)  | O2-Cd2-O11 | 145.52(17) |
| N1-Cd2-O2   | 82.92(10)  | O2-Cd2-N2  | 126.83(12) |
| N1-Cd2-O12  | 104.21(12) | O2-Cd2-N1  | 79.55(12)  |
|             |            | O2-Cd2-C39 | 128.4(2)   |

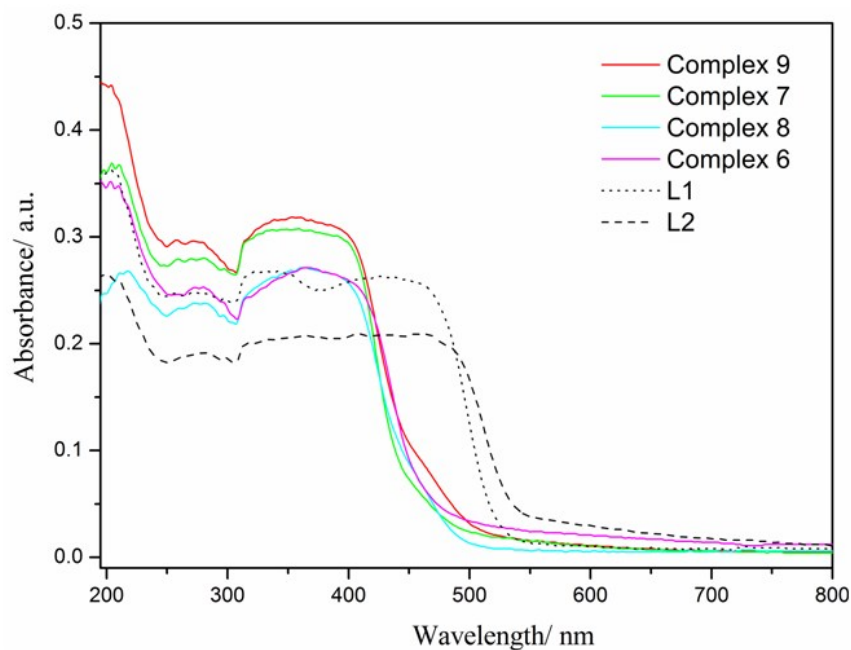

Fig. S10 UV-Vis reflectance spectra of **6-9** in BaSO<sub>4</sub> after Kubelka-Munk transformation.

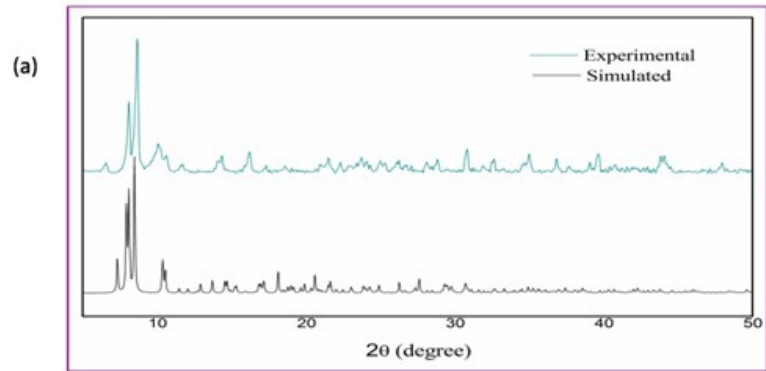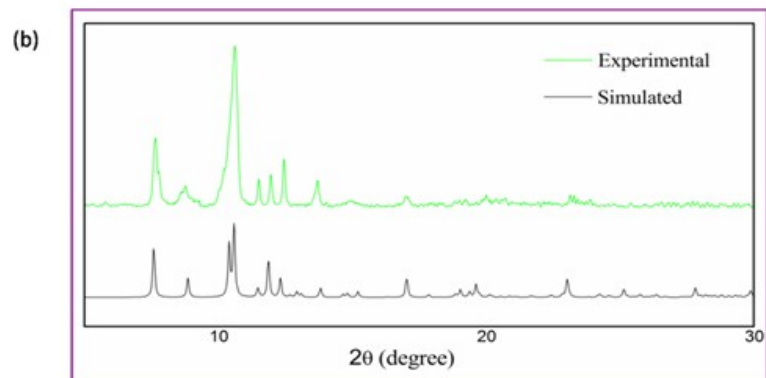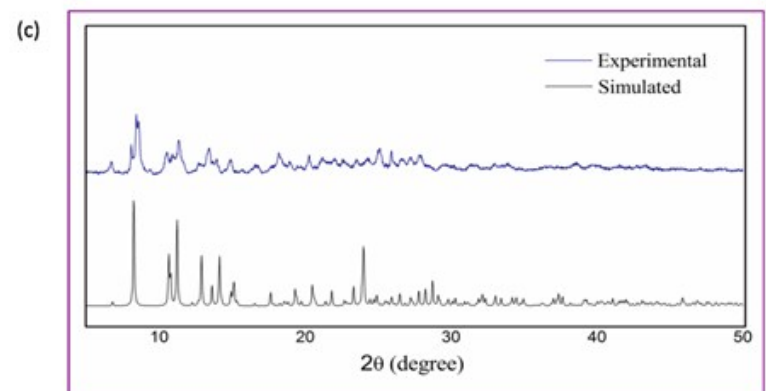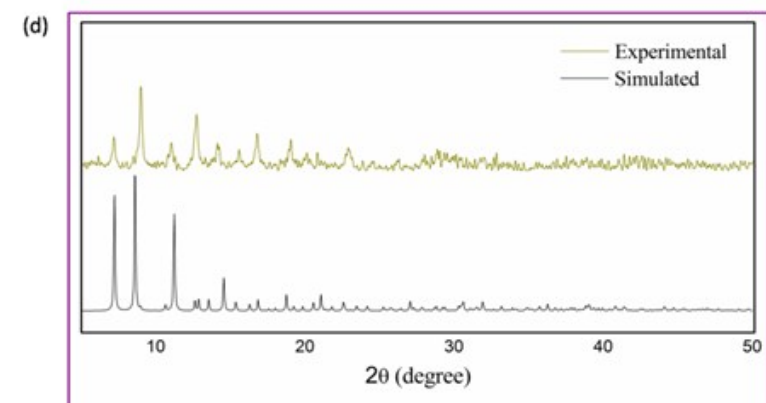

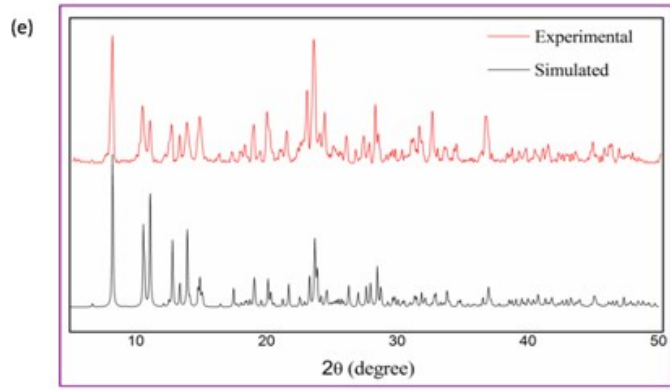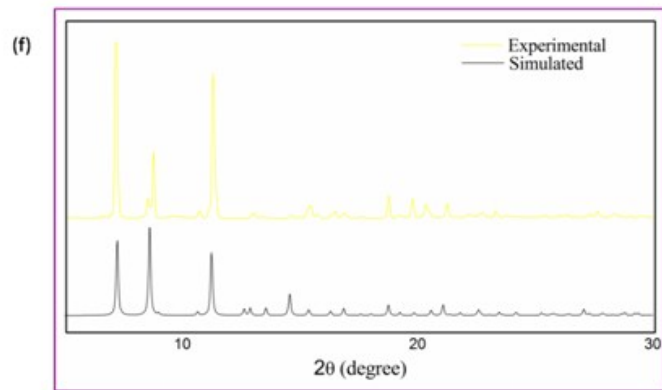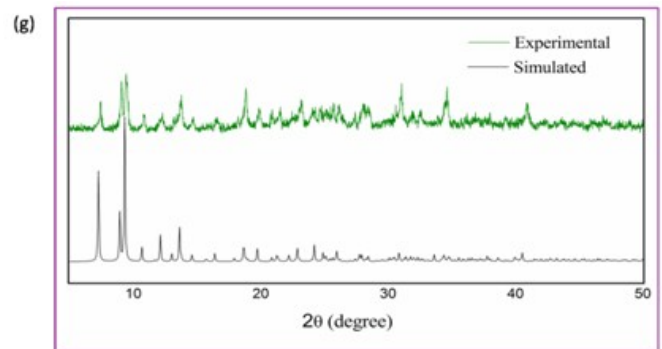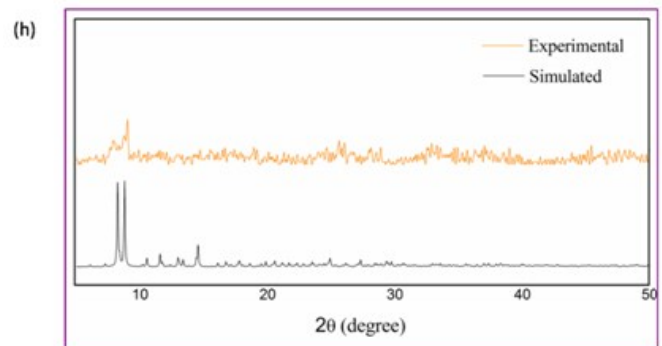

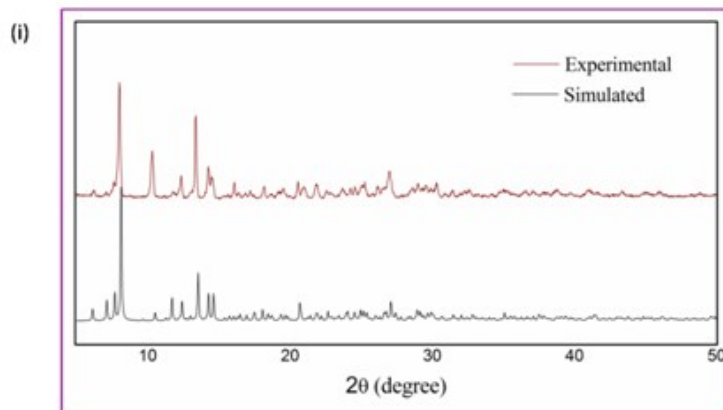

**Fig. S11** PXR D patterns for **1(a)**, **2(b)**, **3(c)**, **4(d)**, **5(e)**, **6(f)**, **7(g)**, **8(h)**, **9(i)**.

**Table S12** Geometry analysis by using shape 2.0 software

|          |        |        |        |        |         |
|----------|--------|--------|--------|--------|---------|
| <b>1</b> | HP-6   | PPY-6  | OC-6   | TPR-6  | JPPY-6  |
| Ni1      | 29.781 | 23.941 | 1.195  | 11.736 | 26.832  |
| Ni2      | 29.691 | 18.567 | 3.265  | 9.57   | 21.864  |
| <b>2</b> |        |        |        |        |         |
| Ni1      | 29.928 | 18.427 | 3.496  | 8.922  | 21.689  |
| Ni2      | 27.321 | 23.624 | 1.176  | 12.98  | 26.188  |
| <b>3</b> |        |        |        |        |         |
| Ni1      | 28.668 | 23.583 | 1.167  | 12.284 | 26.385  |
| Ni2      | 29.61  | 17.89  | 3.8    | 8.156  | 21.081  |
| <b>4</b> |        |        |        |        |         |
| Co1      | 31.129 | 16.229 | 4.576  | 8.32   | 19.729  |
| Co2      | 28.678 | 23.523 | 1.038  | 12.366 | 26.433  |
| <b>5</b> |        |        |        |        |         |
| Co1      | 30.149 | 16.429 | 4.626  | 7.132  | 19.594  |
| Co2      | 29.067 | 22.757 | 1.337  | 12.043 | 25.637  |
| <b>6</b> |        |        |        |        |         |
| Zn1      | 28.383 | 23.775 | 1.179  | 13.615 | 26.536  |
| Zn2      | 30.675 | 16.26  | 5.158  | 7.171  | 19.48   |
| <b>7</b> |        |        |        |        |         |
|          | PP-5   | vOC-5  | TBPY-5 | SPY-5  | JTBPY-5 |
| Cd1      | 28.676 | 5.653  | 5.323  | 1.704  | 9.351   |
| <b>8</b> |        |        |        |        |         |
|          | OP-8   | HBPY-8 | TDD-8  | BTPR-8 | TT-8    |
| Cd2      | 33.68  | 15.235 | 2.111  | 3.55   | 13.787  |
| <b>8</b> |        |        |        |        |         |
|          | OP-8   | HBPY-8 | TDD-8  | BTPR-8 | TT-8    |
| Cd1      | 32.514 | 14.913 | 3.528  | 4.06   | 13.807  |

|          |        |        |        |        |        |
|----------|--------|--------|--------|--------|--------|
|          | HP-6   | PPY-6  | OC-6   | TPR-6  | JPPY-6 |
| Cd2      | 25.56  | 17.669 | 15.289 | 15.915 | 20.74  |
| Cd3      | 29.573 | 10.538 | 16.268 | 2.805  | 14.276 |
| <b>9</b> |        |        |        |        |        |
|          | OP-8   | HBPY-8 | TDD-8  | BTPR-8 | TT-8   |
| Cd1      | 32.28  | 15.519 | 2.941  | 3.961  | 14.366 |
|          | HP-6   | PPY-6  | OC-6   | TPR-6  | JPPY-6 |
| Cd3      | 32.649 | 9.763  | 12.208 | 7.124  | 13.541 |
| Cd2      | 28.184 | 10.178 | 18.584 | 2.834  | 13.643 |

|           |        |                            |
|-----------|--------|----------------------------|
| HP-6      | 1 D6h  | Hexagon                    |
| PPY-6     | 2 C5v  | Pentagonal pyramid         |
| OC-6      | 3 Oh   | Octahedron                 |
| TPR-6     | 4 D3h  | Trigonal prism             |
| JPPY-6    | 5 C5v  | Johnson pentagonal pyramid |
| <b>J2</b> |        |                            |
| OP-8      | 1 D8h  | Octagon                    |
| TDD-8     | 6 D2d  | Triangular dodecahedron    |
| BTPR-8    | 10 C2v | Biaugmented trigonal prism |
| TT-8      | 12 Td  | Triakis tetrahedron        |
| HBPY-8    | 3 D6h  | Hexagonal bipyramid        |
| SPY-5     | 4 C4v  | Spherical square pyramid   |

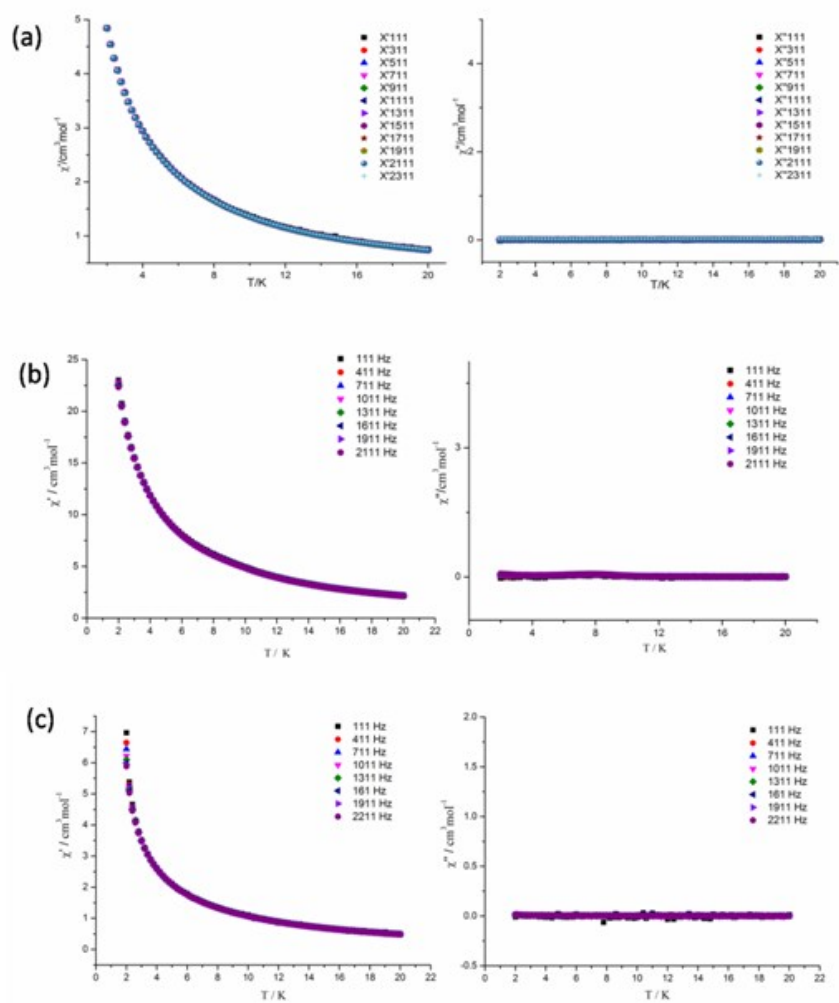

**Fig. S13** plot of temperature dependence of the in-phase ( $\chi'$ ) and out-of phase( $\chi''$ ) AC susceptibility signals for compound **1** (a), **2** (b) and **3** (c) under zero dc field at the indicated frequencies.

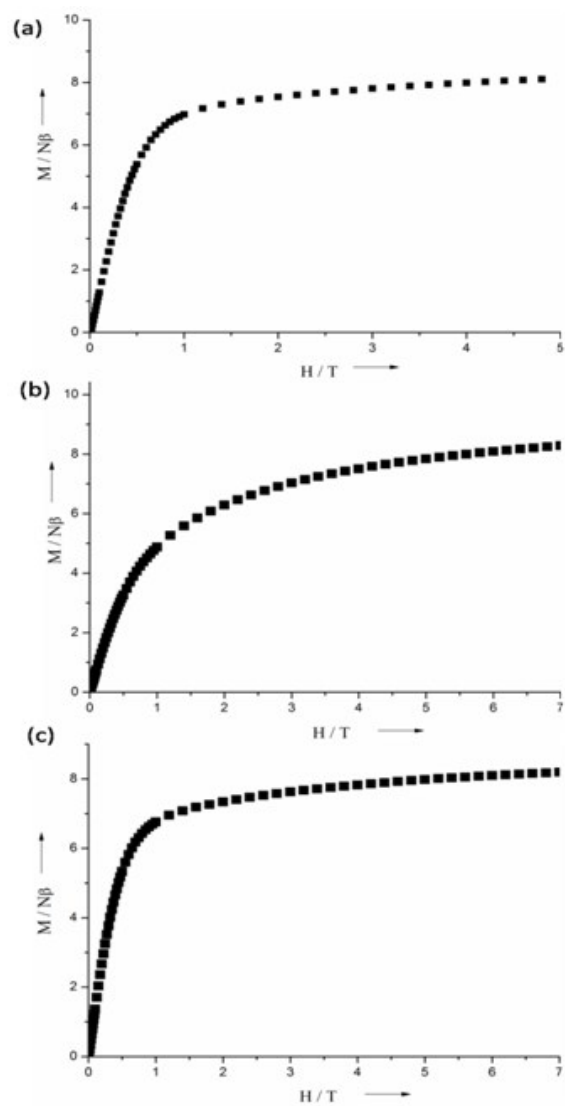

Fig. S14. M versus H/T plot for complexes **1** (a), **2** (b) and **3** (c). the blue solid line represents the curve generated from Brillouin function.

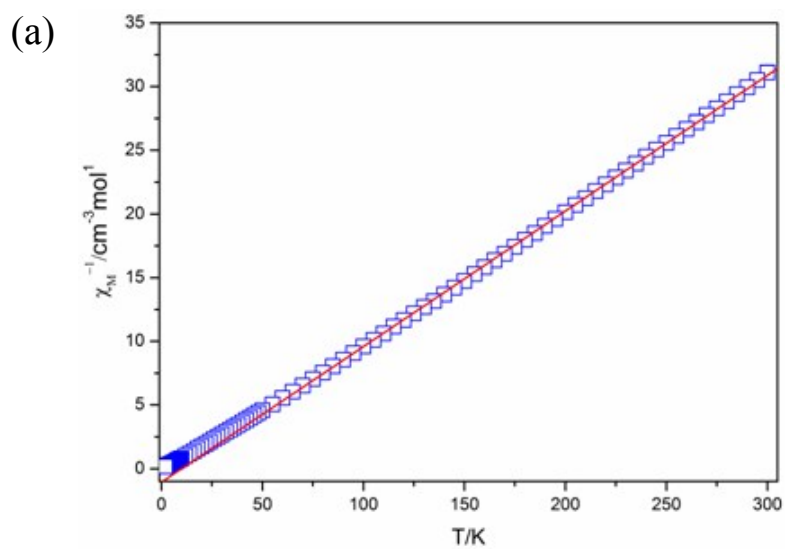

(b)



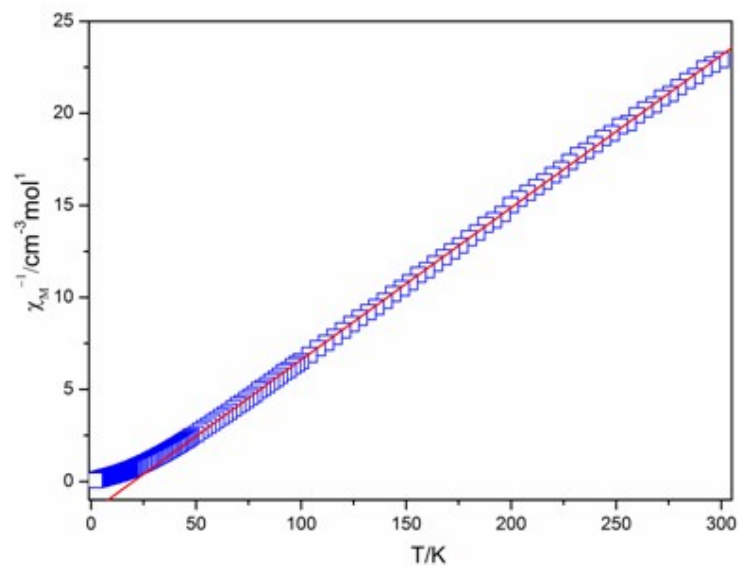

**Fig. S15** the best fitting of the Curie-Weiss law for **4** and **5** in the 50-300 K range.

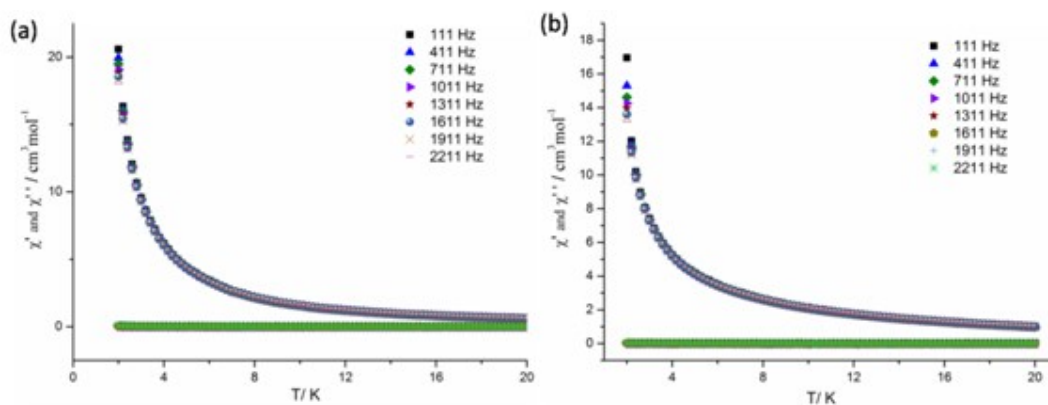

**Fig. S16** plot of temperature dependence of the in-phase ( $\chi'$ ) and out-of phase ( $\chi''$ ) AC susceptibility signals for compound **4** (a) and **5** (b) under zero dc field at the indicated frequencies.

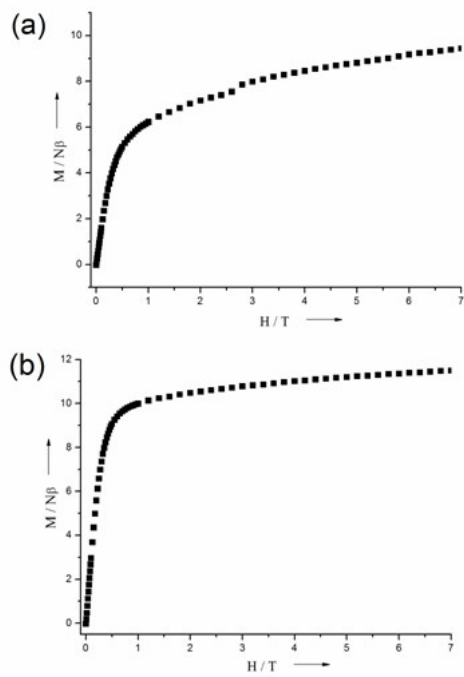

Fig. S17. magnetization  $M$  versus  $H/T$  plot for complexes **4** (a) and **5** (b).

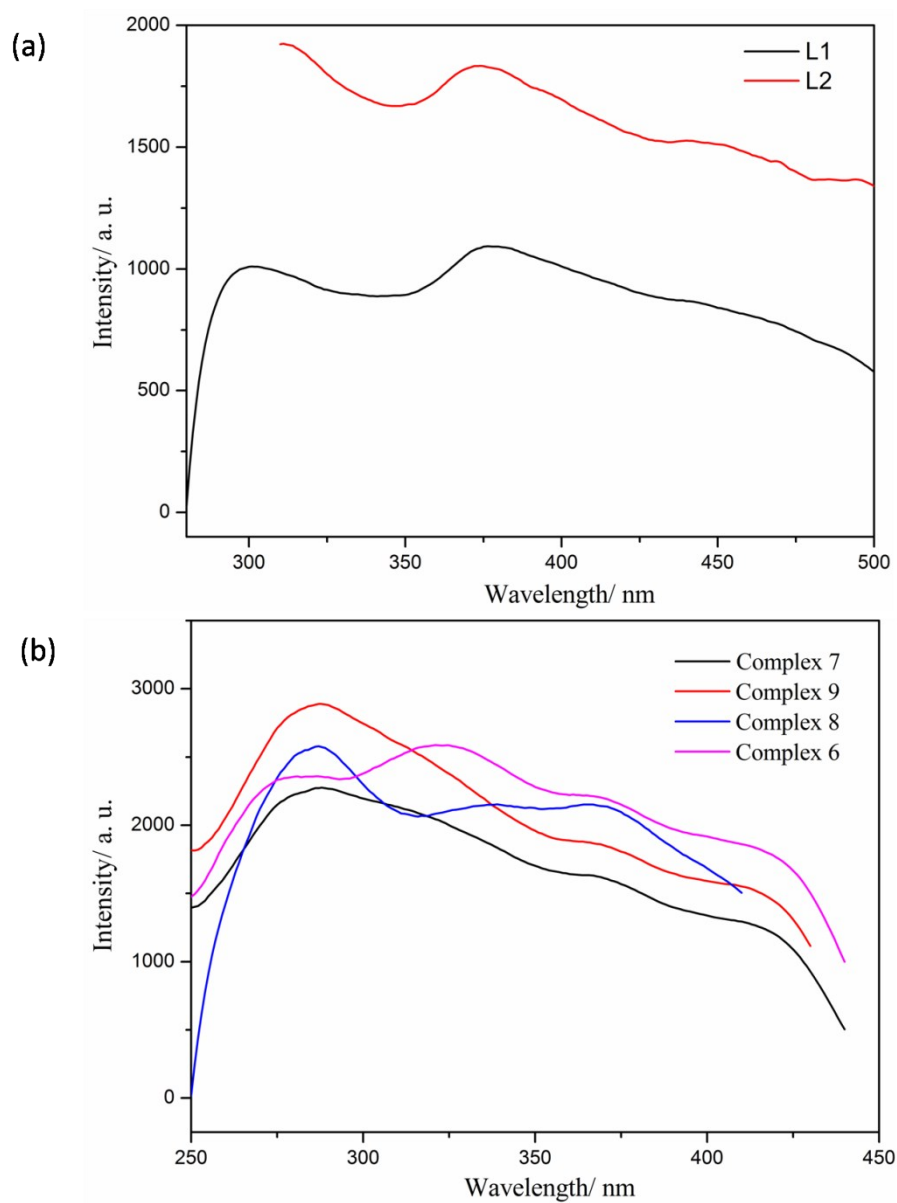

**Fig. S18** Excitation spectra of two ligands and complexes **6-9** in solid state at room temperature. (a):  $\lambda_{em}= 537$  nm for  $H_3L_1$ ,  $\lambda_{em}= 548$  nm for  $H_3L_2$ ; (b):  $\lambda_{em}= 462$  nm for **6**,  $\lambda_{em}= 463$  nm for **7**,  $\lambda_{em}= 448$  nm for **8**,  $\lambda_{em}= 451$  nm for **9**.
